# Supplementary material
Source: publisher figshare collection journal article supplement (https://frontiersin.figshare.com/ndownloader/files/14876525)
Supplement: Supplementary file 1 [file 14876525]

## ***Supplementary Material***

### **High-Performance Perovskite Solar Cells Based on Low-Temperature Processed Electron Extraction Layer**

Shun-Hsiang Chan<sup>a</sup>, Yin-Hsuan Chang<sup>a</sup> and Ming-Chung Wu<sup>a,b,c\*</sup>

- a. Department of Chemical and Materials Engineering, Chang Gung University, Taoyuan 33302, Taiwan
- b. Green Technology Research Center, Chang Gung University, Taoyuan 33302, Taiwan
- c. Division of Neonatology, Department of Pediatrics, Chang Gung Memorial Hospital, Linkou, Taoyuan 33305, Taiwan

\*Corresponding authors.

Ming-Chung Wu: E-mail, [mingchungwu@cgu.edu.tw](mailto:mingchungwu@cgu.edu.tw); phone, +886 3 2118800 #3834; fax, +886 3 3775580

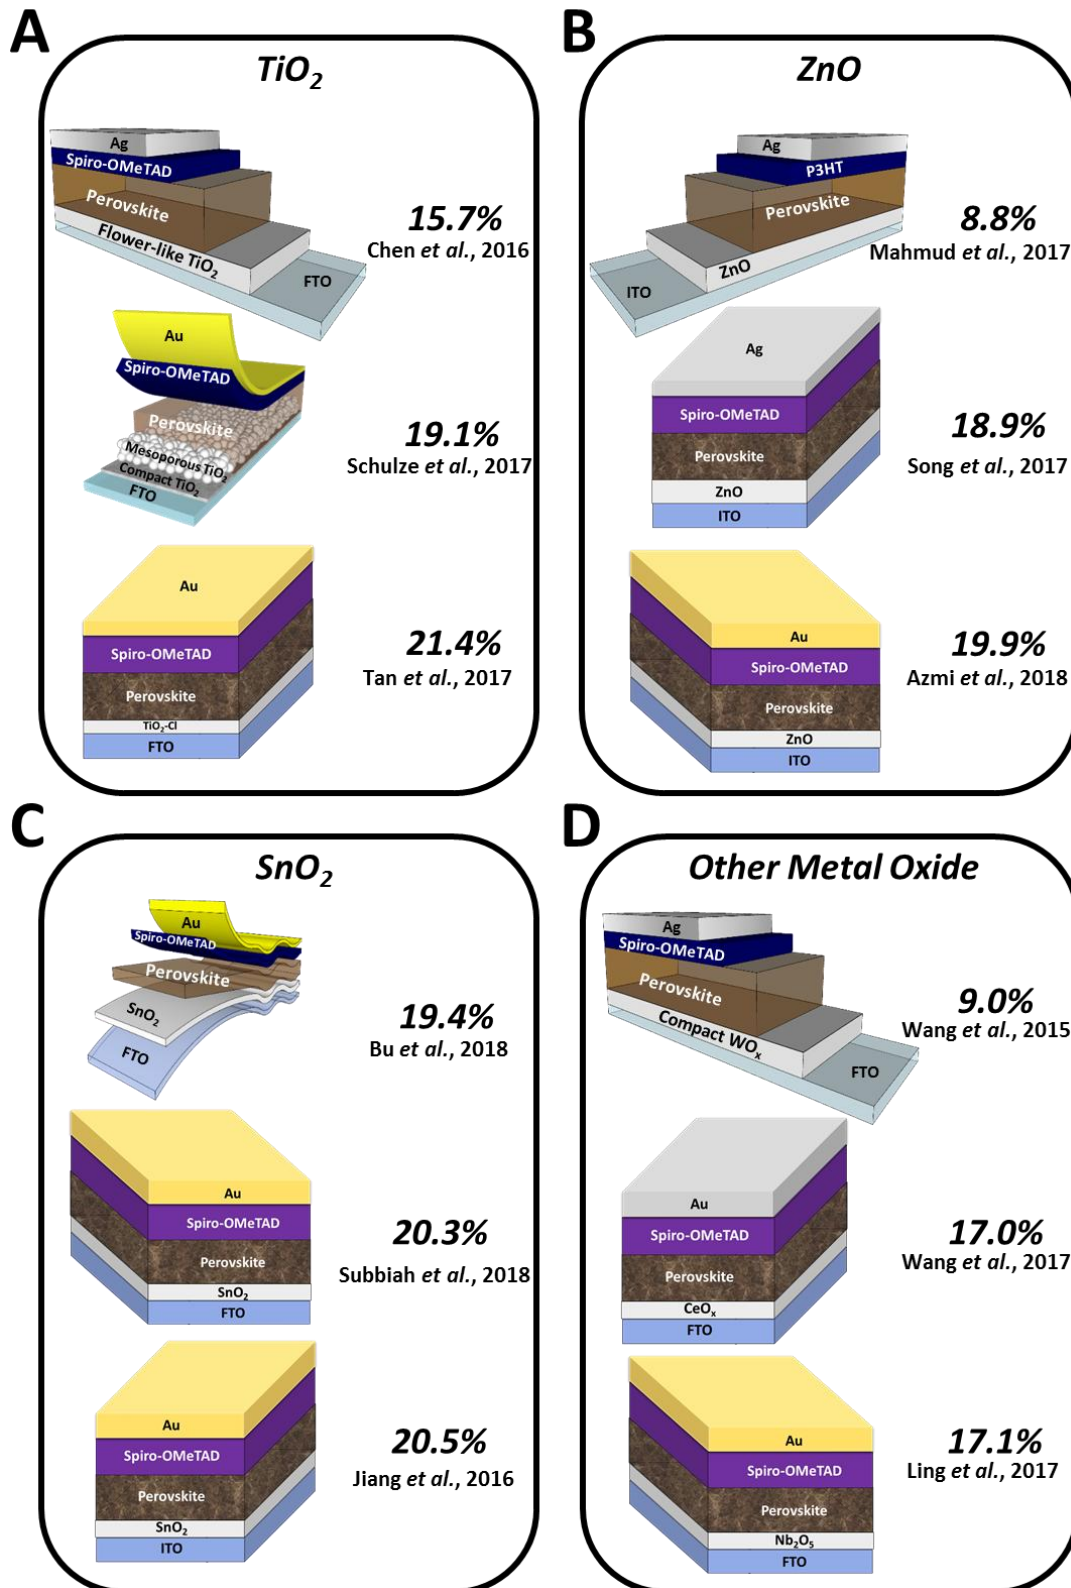

**Supplementary Figure 1.** Schematic diagram and corresponding PCE of n-i-p perovskite device with different EEL. (A)  $TiO_2$ , (B)  $ZnO$ , (C)  $SnO_2$ , and (D) other metal oxide.

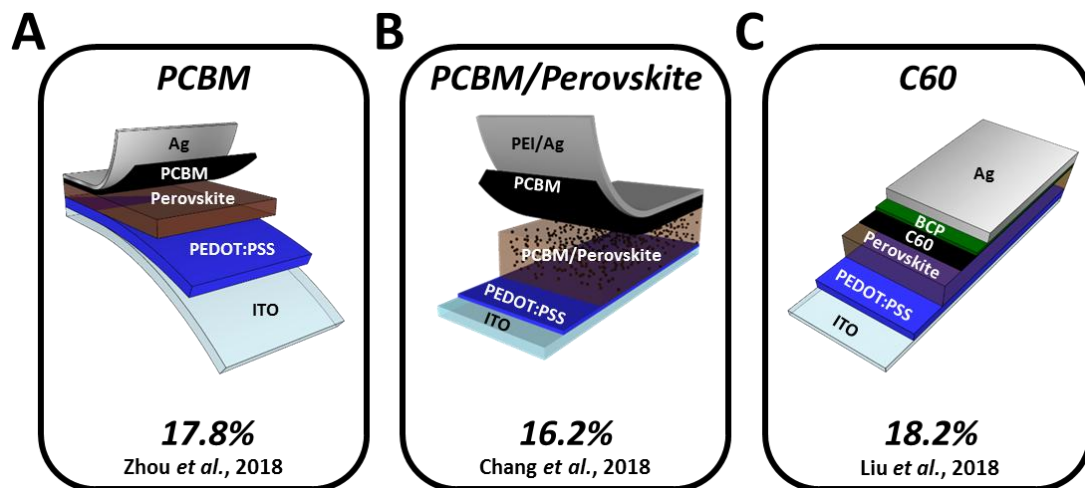

**Supplementary Figure 2.** Schematic diagram and corresponding PCE of p-i-n perovskite device with different EEL. (A) PCBM, (B) PCBM/perovskite BHJ, and (C) C60.
